# Supplementary material for: Ultra-efficient highly-selective MFC-7 cancer cell therapy enabled by combined electric-pulse carbon 1D-nanomaterials platforms
Source: Royal Society of Chemistry journal article supplement (doi:10.1039/d1ma01118a), 2022-01-01
Supplement: d1ma01118a1.pdf [file d1ma01118a1.pdf]

Restricted

## Electronic Supplementary Information

### **Ultra-efficient highly-selective MFC-7 cancer cell therapy enabled by combined electric-pulse carbon 1D-nanomaterials platforms**

Sophia S. Y. Chan,<sup>1</sup> Shao Xiang Go,<sup>1</sup> Maria Prisca Meivita,<sup>1</sup> Denise Lee,<sup>1</sup> Natasa Bajalovic,<sup>1,\*</sup>  
Desmond K. Loke<sup>1,2,\*</sup>

<sup>1</sup>*Department of Science, Mathematics and Technology, Singapore University of Technology and Design,  
Singapore 487372, Singapore*

<sup>2</sup>*Office of Innovation, Changi General Hospital, Singapore 529889, Singapore*

*\*Correspondence and requests for materials should be addressed to N.B. (email:  
natasa\_bajalovic@sutd.edu.sg) or D.K.L. (email: desmond\_loke@sutd.edu.sg)*

Restricted

**Supplementary Table S1** Dimensions of the electrothermal therapy model. Length of the cell layer and cell-CNT-cell layer was varied from 50 to 200  $\mu\text{m}$  in 50  $\mu\text{m}$  increments.

| Material         | Width (nm) | Length ( $\mu\text{m}$ ) | Thickness (nm) |
|------------------|------------|--------------------------|----------------|
| Silicon dioxide  | 3.5        | 101                      | 0.5            |
| Indium tin oxide | 3.5        | 0.5                      | 0.65           |
| Carbon nanotubes | 3.5        | 50 – 200                 | 0.2            |
| Cancer cells     | 3.5        | 50 – 200                 | 0.22           |

**Supplementary Table S2** Parameters used for the electrothermal therapy model.

| Material         | Isotropic thermal conductivity<br>(W/mK) | Isotropic resistivity<br>( $\Omega\text{m}$ ) |
|------------------|------------------------------------------|-----------------------------------------------|
| Silicon dioxide  | 1.4                                      | $10^{14}$                                     |
| Indium tin oxide | 4                                        | $1 \times 10^{-6}$                            |
| Carbon nanotubes | 3000                                     | $5 \times 10^{-7}$                            |
| Cancer cells     | 0.63                                     | 0.9776                                        |

**Supplementary Table S3** Significance for CNT cytotoxicity for MCF-10A cells and MCF-7 cells after (a) 24 h and (b) 48 h. Significance was measured using Student's t-test and is presented as:  $p < 0.05$  (\*),  $p < 0.01$  (\*\*),  $p < 0.001$  (\*\*\*) and  $p < 0.0001$  (\*\*\*\*). Unmarked significance denotes non-significance.

(a)

|                           |                      | Concentrations of CNT (µg/mL) |    |      |      |
|---------------------------|----------------------|-------------------------------|----|------|------|
|                           |                      | 5                             | 10 | 20   | 30   |
| <b>MCF-10A (t = 24 h)</b> | Compared to Control  |                               |    |      | *    |
|                           | Compared to 5 µg/mL  |                               |    |      | **   |
|                           | Compared to 10 µg/mL |                               |    |      | **   |
|                           | Compared to 20 µg/mL |                               |    |      | **   |
| <b>MCF-7 (t = 24 h)</b>   | Compared to Control  |                               | ** | **** | **** |
|                           | Compared to 5 µg/mL  |                               |    | ***  | ***  |
|                           | Compared to 10 µg/mL |                               |    | **   | ***  |
|                           | Compared to 20 µg/mL |                               |    |      | **   |

(b)

|                           |                      | Concentrations of CNT (µg/mL) |    |      |     |
|---------------------------|----------------------|-------------------------------|----|------|-----|
|                           |                      | 5                             | 10 | 20   | 30  |
| <b>MCF-10A (t = 48 h)</b> | Compared to t = 24 h |                               |    | **** |     |
|                           | Compared to Control  |                               |    | **   | *** |
|                           | Compared to 5 µg/mL  |                               |    | **   | *** |
|                           | Compared to 10 µg/mL |                               |    | **   | **  |
|                           | Compared to 20 µg/mL |                               |    |      |     |
| <b>MCF-7 (t = 48 h)</b>   | Compared to t = 24 h | **                            | ** | **   | *** |
|                           | Compared to Control  | **                            | ** | ***  | *** |
|                           | Compared to 5 µg/mL  |                               |    | ***  | *** |
|                           | Compared to 10 µg/mL |                               |    | *    | **  |
|                           | Compared to 20 µg/mL |                               |    |      | *   |

**Supplementary Table S4** References for Fig. 3d. Percentage decrease in cell viability for state-of-the-art, carbon-based photothermal nanoagents without additional chemotherapeutic drugs.

| Ref no. | Reference                                                                                                                                                                                                                                                       |
|---------|-----------------------------------------------------------------------------------------------------------------------------------------------------------------------------------------------------------------------------------------------------------------|
| 1       | Wang, Y., Wang, H., Liu, D., Song, S., Wang, X., Zhang, H., Graphene oxide covalently grafted upconversion nanoparticles for combined NIR mediated imaging and photothermal/photodynamic cancer therapy. <i>Biomater.</i> , <b>34</b> , 7715-7724 (2013).       |
| 2       | Liu, J., Wang, C., Wang, X., Wang, X., Cheng, L., Li, Y., Liu, Z., Mesoporous silica coated single-walled carbon nanotubes as a multifunctional light-responsive platform for cancer combination therapy. <i>Adv. Func. Mater.</i> , <b>23</b> , 384-392 (2014) |
| 3       | Sahu, A., Choi, W. I., Lee, J. H., Tae, G., Graphene oxide mediated delivery of methylene blue for combined photodynamic and photothermal therapy. <i>Biomater.</i> , <b>34</b> , 6239-6248 (2013)                                                              |

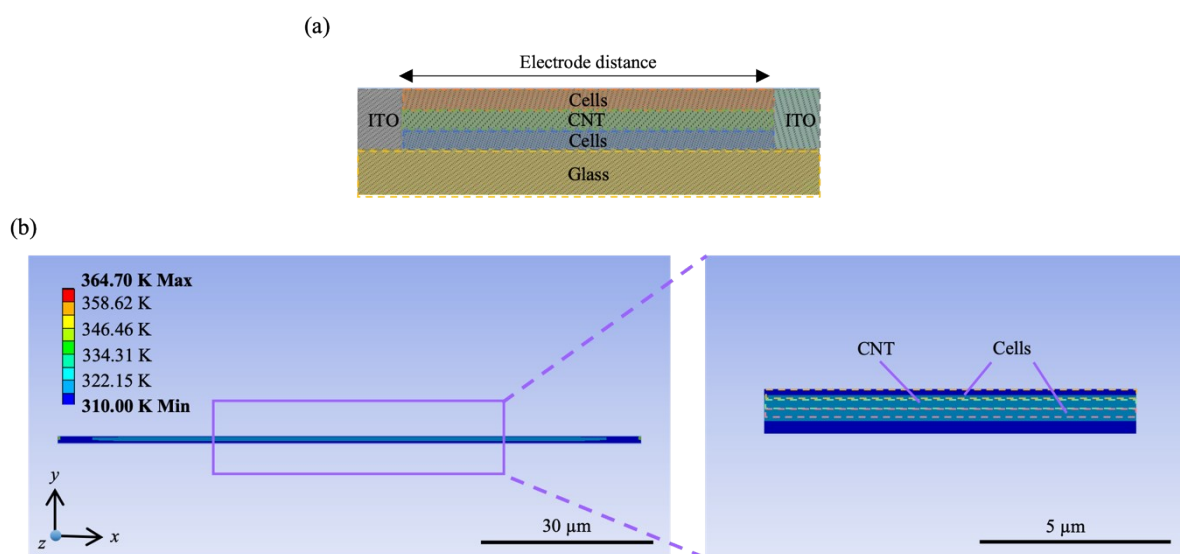

**Supplementary Figure S1** Thermal modelling. (a) Model structure showing a cell-CNT-cell layer (model with CNT). The model comprised two indium tin oxide (ITO) electrodes on a glass substrate. The distance between the electrodes was varied from 50 – 200  $\mu\text{m}$  in 50  $\mu\text{m}$  increments. (b) Thermal distribution of the model with CNT with a 100  $\mu\text{m}$  electrode gap. After applying a square bias-voltage pulse (10 V, pulse width = 1 ms), an increase in temperature was observed within the CNT layer and it propagated outwards to the cell layers. The image on the right presents a zoom-in snapshot of the center of the model.

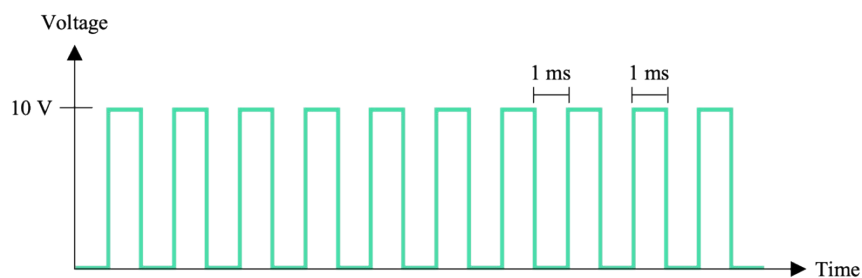

**Supplementary Figure S2** Schematic illustration of the applied electrical waveform (AC pulses): 10 square bias-voltage pulses with an amplitude of 10 V and a pulse width of 1 ms.

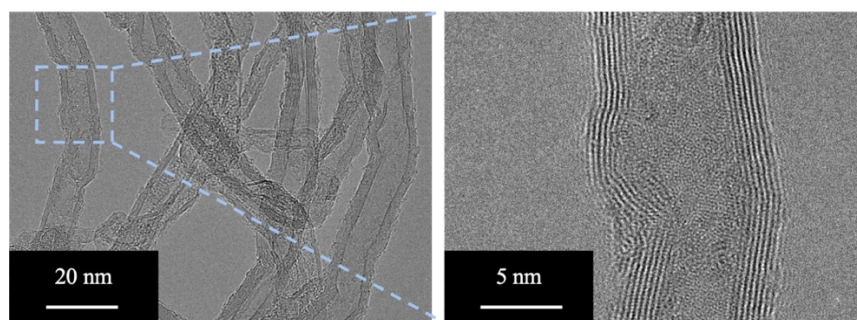

**Supplementary Figure S3** TEM images of tube-like features of CNT (left) with high magnified images of the CNT detailing defined carbon atoms lining the walls (right).

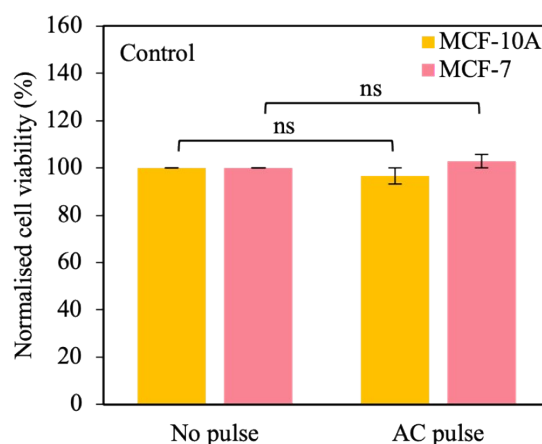

**Supplementary Figure S4** Normalised cell viabilities for MCF-10A cells (yellow) and MCF-7 cells (pink) after applying the AC pulse. Values were normalised to cells without pulse. Data represent mean  $\pm$  SEM, ( $n = 6$  from 3 independent experiments). Significance was calculated using a Student's t-test. Non-significance is denoted as ns.

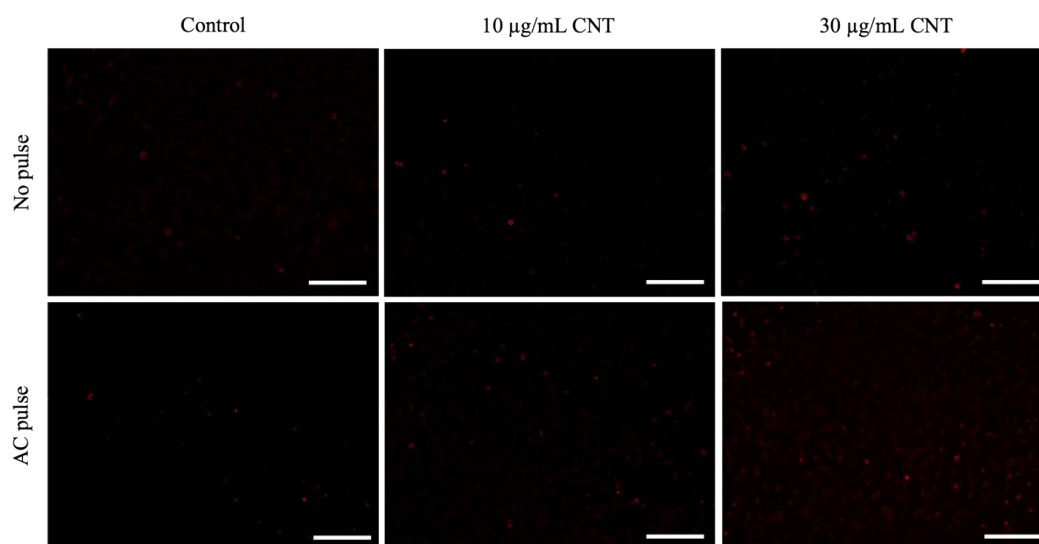

**Supplementary Figure S5** Propidium iodide (PI) staining for MCF-10A cells ~24 h after AC pulse application. Cells were incubated with different CNT concentrations (0, 10 and 30  $\mu\text{g/mL}$ ). Scale bar is 200  $\mu\text{m}$ .
